# Supplementary material
Source: publisher figshare collection journal article supplement (https://acs.figshare.com/ndownloader/files/25388926)
Supplement: Supplementary file 1 [file 25388926]

# First Observed Metal-like to Insulator Transition in the Vacant 3d Orbital Quantum Spin Liquid $\text{Tb}_2\text{Ti}_2\text{O}_7$

B. Santhosh Kumar and C. Venkateswaran\*

Department of Nuclear Physics, University of Madras, Guindy campus, Chennai – 600 025, India.

\* *E mail: cvunom@hotmail.com*

## Supporting Information:

Figure 1 shows the variation of resistivity as a function of temperature ( $\rho$  vs  $T$ ) for heating and cooling cycle. The absence of hysteresis in “metal-like to insulator transition” at 603 K is characteristics of the second-order transition.

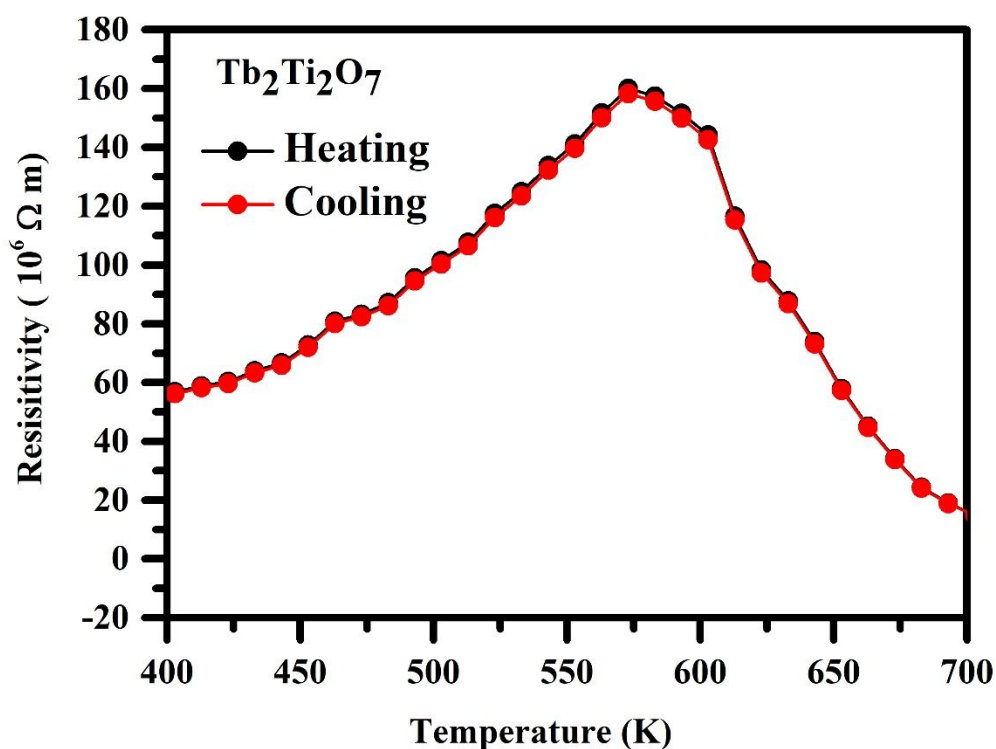

Figure 1: Resistivity as a function of temperature for the heating and cooling cycle of  $\text{Tb}_2\text{Ti}_2\text{O}_7$ .

Figure 2 shows the variation of electric modulus with temperature from 403 K to 803 K. Till 603 K the magnitude of  $M''$  peak decreases due to the metal-like behaviour and from 603 K the trend is reversed.

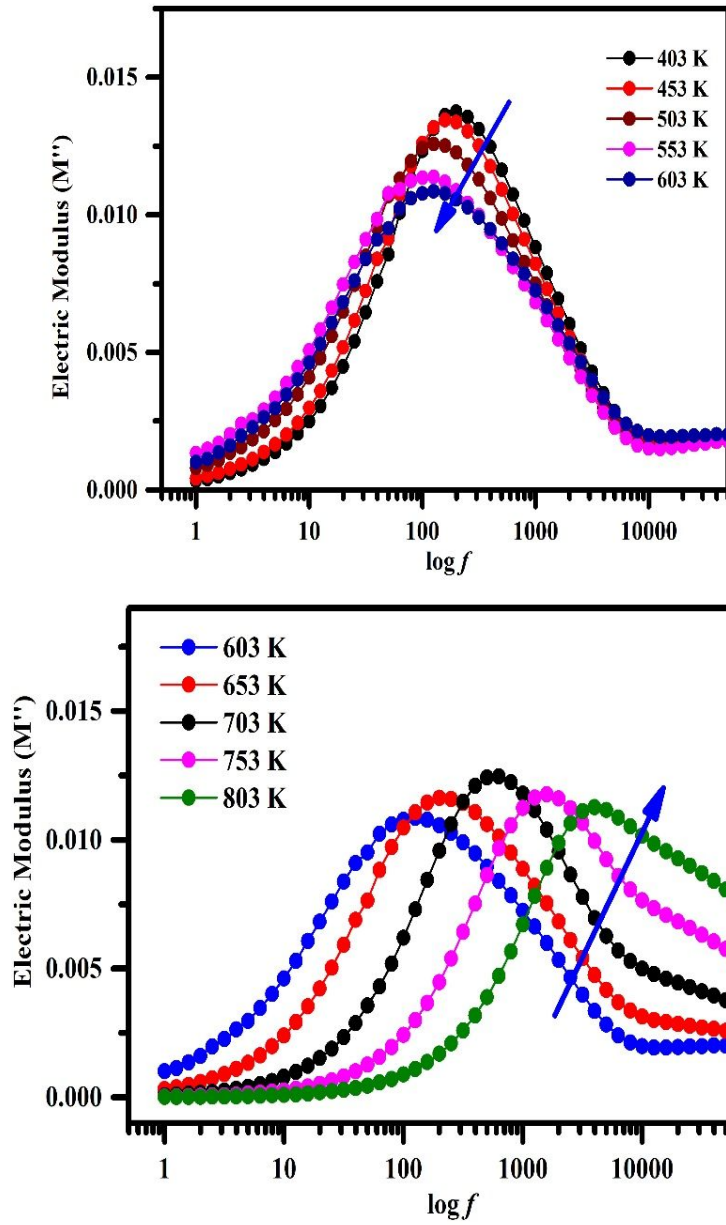

Figure 2: Electric modulus of  $\text{Tb}_2\text{Ti}_2\text{O}_7$  from 403 K to 803 K. (top) the plot shows decrease in magnitude of  $M''$  from 403 K to 603 K and beyond  $T_{\text{MTI}}$  (603 K) a clear shift in the peak is observed (bottom) from 603 to 803 K.
